# Supplementary material for: Fluorescent cadmium(ii) metal–organic frameworks exhibit excellent stability and detection ability to Fe3+ and MnO4− ions
Source: Royal Society of Chemistry journal article supplement (doi:10.1039/d3nj02631k), 2023-01-01
Supplement: d3nj02631k1.pdf [file d3nj02631k1.pdf]

## Supporting Information

### **Fluorescent cadmium(II) metal-organic frameworks exhibiting excellent stability and detection ability to Fe<sup>3+</sup> and MnO<sub>4</sub><sup>-</sup> ions**

Peipei Cen,<sup>a,†,\*</sup> Tongtong, Ma,<sup>a,†</sup> Fujunrui Jiang,<sup>a</sup> Fengyuan Zhang,<sup>a</sup> Yanping He,<sup>b</sup> Runmei Ding<sup>a</sup> and Danian Tian<sup>a,\*</sup>

a College of Public Health, College of Basic Medical Science, Ningxia Medical University, YinChuan 750021, China.

b Department of Pharmaceutical Preparation, General Hospital of Ningxia Medical University.

† These authors contributed equally to this work.

#### **\*Corresponding author**

**Dr. Peipei Cen**

**E-mail: 13895400691@163.com**

#### **\*Corresponding author**

**Prof. Danian Tian**

**E-mail: tiandanian@163.com.**

## Contents:

**Table S1.** Selected crystallographic data and structure refinement for compounds **NLMOF-1** and **NLMOF-2**

**Table S2.** Selected bond lengths (Å) and bond angles (°) for **NLMOF-1**

**Table S3.** Selected bond lengths (Å) and bond angles (°) for **NLMOF-2**

**Fig. S1** Topology graph of **NLMOF-1**

**Fig. S2** Topology graph of **NLMOF-2**

**Fig. S3** Powder X-ray diffraction pattern of **NLMOF-1** and **NLMOF-2**

**Fig. S4** TG curve of **NLMOF-1**

**Fig. S5** The solid state fluorescence spectrum of H<sub>4</sub>tcbpe ligand (a) and **NLMOF-1** (b)

**Fig. S6** Emission spectra of **NLMOF-1** in 10mM different cations at 430 nm in H<sub>2</sub>O

**Fig. S7** Emission spectra of **NLMOF-1** in 10mM different anions at 430 nm in H<sub>2</sub>O

**Fig. S8** Fluorescence intensity of **NLMOF-1** when MnO<sub>4</sub><sup>-</sup> coexists with other anions in H<sub>2</sub>O

**Fig. S9** Emission spectra of **NLMOF-1** dispersed in H<sub>2</sub>O with different concentrations of MnO<sub>4</sub><sup>-</sup>

**Fig. S10** Stern-Volmer plot of different concentrations of MnO<sub>4</sub><sup>-</sup> exist in H<sub>2</sub>O of **NLMOF-1**

**Fig. S11** (a) Excitation spectra of **NLMOF-1** in aqueous solution; (b) UV-vis adsorption spectra of Na<sub>x</sub>(A) in aqueous solution

**Fig. S12** Emission spectra of **NLMOF-1** in 10mM different cations at 430 nm in DMF

**Fig. S13** Fluorescence intensity of **NLMOF-1** when Fe<sup>3+</sup> coexists with other cations in DMF

**Fig. S14** Emission spectra of **NLMOF-1** dispersed in DMF with different concentrations of Fe<sup>3+</sup>

**Fig. S15** Stern-Volmer plot of different concentrations of Fe<sup>3+</sup> exist in **NLMOF-1**

**Fig. S16** Emission spectra of **NLMOF-1** in 10mM different anions at 430 nm in DMF

**Fig. S17** (a) Emission spectra of **NLMOF-1** dispersed in DMF with different concentrations of  $\text{CrO}_4^{2-}$ ; (b) Emission spectra of **NLMOF-1** dispersed in DMF with different concentrations of  $\text{MnO}_4^-$

**Fig. S18** (a) Stern-Volmer plot of different concentrations of  $\text{CrO}_4^{2-}$  exist of **NLMOF-1** in DMF; (b) Stern-Volmer plot of different concentrations of  $\text{MnO}_4^-$  exist of **NLMOF-1** in DMF

**Fig. S19** (a) Excitation spectra of **NLMOF-1** in DMF solution; (b) UV-vis adsorption spectra of  $\text{M}(\text{NO}_3)_x$  in DMF solution

**Fig. S20** Emission spectra of **NLMOF-1** in 10mM different cations at 430 nm in acetonitrile

**Fig. S21** Fluorescence intensity of **NLMOF-1** when  $\text{Fe}^{3+}$  coexists with other cations in acetonitrile

**Fig. S22** Emission spectra of **NLMOF-1** dispersed in acetonitrile with different concentrations of  $\text{Fe}^{3+}$

**Fig. S23** Emission spectra of **NLMOF-1** in 10mM different anions at 430 nm in acetonitrile

**Fig. S24** Fluorescence intensity of **NLMOF-1** when  $\text{MnO}_4^-$  coexists with other anions in acetonitrile

**Fig. S25** Emission spectra of **NLMOF-1** dispersed in acetonitrile with different concentrations of  $\text{MnO}_4^-$

**Fig. S26** (a) Stern-Volmer plot of different concentrations of  $\text{Fe}^{3+}$  exist of **NLMOF-1** in acetonitrile; (b) Stern-Volmer plot of different concentrations of  $\text{MnO}_4^-$  exist of **NLMOF-1** in acetonitrile

**Fig. S27** Emission spectra of **NLMOF-1** in 10mM different cations at 430 nm in methanol

**Fig. S28** Emission spectra of **NLMOF-1** in 10mM different anions at 430 nm in methanol

**Fig. S29** (a) Emission spectra of **NLMOF-1** dispersed in methanol with different concentrations of  $\text{Fe}^{3+}$ ; (b) Emission spectra of **NLMOF-1** dispersed in methanol with different concentrations of  $\text{Cr}^{3+}$

**Fig. S30** (a) Stern-Volmer plot of different concentrations of  $\text{Fe}^{3+}$  exist of **NLMOF-1** in methanol; (b) Stern-Volmer plot of different concentrations of  $\text{Cr}^{3+}$  exist of **NLMOF-1** in methanol

**Fig. S31** Emission spectra of **NLMOF-1** in 10mM different cations at 430 nm in ethanol

**Fig. S32** Emission spectra of **NLMOF-1** in 10mM different anions at 430 nm in ethanol

**Fig. S33** (a) Emission spectra of **NLMOF-1** dispersed in ethanol with different concentrations of  $\text{Fe}^{3+}$ ; (b) Emission spectra of **NLMOF-1** dispersed in ethanol with different concentrations of  $\text{Cr}^{3+}$

**Fig. S34** (a) Stern-Volmer plot of different concentrations of  $\text{Fe}^{3+}$  exist of **NLMOF-1** in ethanol; (b) Stern-Volmer plot of different concentrations of  $\text{Cr}^{3+}$  exist of **NLMOF-1** in ethanol

**Fig. S35** The recyclability of the quenching ability of **NLMOF-1** immersed in DMA and in the presence of 0.01 M aqueous solution of  $\text{Fe}^{3+}$  ions

**Fig. S36** The PXRD patterns of **NLMOF-1** treated with  $\text{Fe}^{3+}$  and  $\text{MnO}_4^-$  solution in DMA

**Fig. S37**  $\text{N}_2$  adsorption of **NLMOF-1** before and after sensing experiments.

**Fig. S38** Fluorescence lifetimes of (a) **NLMOF-1** and (b) **NLMOF-1**@ $\text{Fe}^{3+}$ (20 $\mu\text{L}$ , 0.01mol/L).

**Table S1.** Selected crystallographic data and structure refinement for compounds **NLMOF-1** and **NLMOF-2**

| Compound                                                                    | <b>NLMOF-1</b>                                                      | <b>NLMOF-2</b>                                                    |
|-----------------------------------------------------------------------------|---------------------------------------------------------------------|-------------------------------------------------------------------|
| Empirical formula                                                           | C <sub>162</sub> H <sub>99</sub> Cd <sub>4.25</sub> O <sub>24</sub> | C <sub>108</sub> Cd <sub>2</sub> O <sub>16</sub> KH <sub>67</sub> |
| Formula weight                                                              | 2879.1499                                                           | 1884.51                                                           |
| Temperature                                                                 | 190(2)                                                              | 190(2)                                                            |
| Crystal system                                                              | monoclinic                                                          | tetragonal                                                        |
| Space group                                                                 | <i>C2/c</i>                                                         | <i>P4<sub>3</sub>2<sub>1</sub>2</i>                               |
| <i>a</i> (Å)                                                                | 17.9028(5)                                                          | 10.0200(5)                                                        |
| <i>b</i> (Å)                                                                | 38.1443(11)                                                         | 10.0200(5)                                                        |
| <i>c</i> (Å)                                                                | 31.7645(9)                                                          | 88.189(4)                                                         |
| $\alpha$ (°)                                                                | 90                                                                  | 90                                                                |
| $\beta$ (°)                                                                 | 98.922(2)                                                           | 90                                                                |
| $\gamma$ (°)                                                                | 90                                                                  | 90                                                                |
| <i>V</i> (Å <sup>3</sup> )                                                  | 21429.2(11)                                                         | 8854.2(10)                                                        |
| <i>Z</i>                                                                    | 4                                                                   | 4                                                                 |
| <i>D</i> (g/cm <sup>3</sup> )                                               | 0.892                                                               | 1.414                                                             |
| <i>Mu</i> (mm <sup>-1</sup> )                                               | 2.510                                                               | 3.269                                                             |
| <i>F</i> (0 0 0)                                                            | 5868.0                                                              | 3832.0                                                            |
| Unique reflections                                                          | 17720                                                               | 7054                                                              |
| Observed reflections                                                        | 147613                                                              | 92511                                                             |
| <i>R</i> <sub>int</sub>                                                     | 0.1175                                                              | 0.1873                                                            |
| <i>R</i> <sub>1</sub> , <i>wR</i> <sub>2</sub> [ <i>I</i> > 2σ( <i>I</i> )] | <i>R</i> <sub>1</sub> = 0.0878, <i>wR</i> <sub>2</sub> = 0.2326     | <i>R</i> <sub>1</sub> = 0.1182, <i>wR</i> <sub>2</sub> = 0.2915   |
| <i>R</i> <sub>1</sub> , <i>wR</i> <sub>2</sub> (all data)                   | <i>R</i> <sub>1</sub> = 0.1537, <i>wR</i> <sub>2</sub> = 0.2632     | <i>R</i> <sub>1</sub> = 0.1844, <i>wR</i> <sub>2</sub> = 0.3252   |
| Goodness-of-fit on <i>F</i> <sup>2</sup>                                    | 1.184                                                               | 1.168                                                             |

**Table S2.** Selected bond lengths (Å) and bond angles (°) for **NLMOF-1**

| <b>NLMOF-1</b>        |                       |                         |                     |
|-----------------------|-----------------------|-------------------------|---------------------|
| Cd3-O(1_2)            | 1.681(16)             | O(2_2)-Cd4-O(4_2)#3     | 172.5(4)            |
| Cd3-O(3_1)#2          | 2.295(8)              | O(3_2)#2-Cd4-O(4_2)#2   | 55.1(2)             |
| Cd3-O(3_2)#3          | 2.448(9)              | O(3_2)#3-Cd4-O(4_2)#2   | 91.9(2)             |
| Cd3-O(7_1)            | 2.481(9)              | O(2_2)#4-Cd4-O(4_2)#2   | 172.5(4)            |
| Cd4-O(3_2)#2          | 2.346(5)              | O(2_2)-Cd4-O(4_2)#2     | 86.8(4)             |
| Cd4-O(3_2)#3          | 2.346(5)              | O(4_2)#3-Cd4-O(4_2)#2   | 85.8(3)             |
| Cd4-O(2_2)#4          | 2.388(16)             | O(3_1)#5-Cd2-O(8_1)#6   | 97.2(2)             |
| Cd4-O(2_2)            | 2.388(16)             | O(3_1)#5-Cd2-O(2_1)     | 140.7(2)            |
| Cd4-O(4_2)#3          | 2.407(6)              | O(8_1)#6-Cd2-O(2_1)     | 93.1(2)             |
| Cd4-O(4_2)#2          | 2.407(6)              | O(3_1)#5-Cd2-O(6_1)#7   | 94.5(2)             |
| Cd2-O(3_1)#5          | 2.225(5)              | O(8_1)#6-Cd2-O(6_1)#7   | 147.2(2)            |
| Cd2-O(8_1)#6          | 2.230(6)              | O(2_1)-Cd2-O(6_1)#7     | 97.0(2)             |
| Cd2-O(2_1)            | 2.248(6)              | O(3_1)#5-Cd2-O(5_1)#7   | 121.48(19)          |
| Cd2-O(6_1)#7          | 2.280(5)              | O(8_1)#6-Cd2-O(5_1)#7   | 92.6(2)             |
| Cd2-O(5_1)#7          | 2.428(6)              | O(2_1)#6-Cd2-O(5_1)#7   | 95.6(2)             |
| Cd2-O(1_1)            | 2.594(7)              | O(6_1)#7-Cd2-O(5_1)#7   | 55.4(2)             |
| Cd1-O(5_1)#9          | 2.408(6)              | O(3_1)#5-Cd2-O(1_1)     | 87.1(2)             |
| Cd1-O(5_1)#10         | 2.408(6)              | O(8_1)#6-Cd2-O(1_1)     | 116.6(2)            |
| Cd1-O(8_1)#11         | 2.471(7)              | O(2_1)-Cd2-O(1_1)       | 54.7(2)             |
| Cd1-O(8_1)#7          | 2.471(7)              | O(6_1)-Cd2-O(1_1)       | 94.5(2)             |
| Cd1-O(4_1)#12         | 2.481(7)              | O(5_1)#7-Cd2-O(1_1)     | 137.1(2)            |
| Cd1-O(4_1)            | 2.481(7)              | O(5_1)#9-Cd1-O(5_1)#10  | 165.3(4)            |
| O(1_2)-Cd3-O(3_1)#2   | 152.1(9)              | O(5_1)#9-Cd1-O(8_1)#11  | 103.8(2)            |
| O(1_2)-Cd3-O(3_2)#3   | 104.5(6)              | O(5_1)#10-Cd1-O(8_1)#11 | 87.4(2)             |
| O(3_1)#2-Cd3-O(3_2)#3 | 83.0(3)               | O(5_1)#9-Cd1-O(8_1)#7   | 87.4(2)             |
| O(1_2)-Cd3-O(7_1)     | 105.2(6)              | O(5_1)#10-Cd1-O(8_1)#7  | 103.8(2)            |
| O(3_1)#2-Cd3-O(7_1)   | 81.7(3)               | O(8_1)#11-Cd1-O(8_1)#7  | 81.3(3)             |
| O(3_2)#3-Cd3-O(7_1)   | 142.0(6)              | O(5_1)#9-Cd1-O(4_1)#12  | 92.1(2)             |
| O(3_2)#2-Cd4-O(3_2)#3 | 136.8(3)              | O(5_1)#10-Cd1-O(4_1)#12 | 80.4(2)             |
| O(3_2)#2-Cd4-O(2_2)#4 | 124.1(5)              | O(8_1)#11-Cd1-O(4_1)#12 | 79.8(2)             |
| O(3_2)#3-Cd4-O(2_2)#4 | 84.8(4)               | O(8_1)#7-Cd1-O(4_1)#12  | 160.4(3)            |
| O(3_2)#2-Cd4-O(2_2)   | 84.8(4)               | O(5_1)#9-Cd1-O(4_1)     | 80.4(2)             |
| O(3_2)#2-Cd4-O(2_2)   | 124.1(5)              | O(5_1)#10-Cd1-O(4_1)    | 92.1(2)             |
| O(2_2)#-Cd4-O(2_2)    | 100.6(8)              | O(8_1)#11-Cd1-O(4_1)    | 160.4(3)            |
| O(3_2)#2-Cd4-O(4_2)#3 | 91.9(2)               | O(8_1)#7-Cd1-O(4_1)     | 79.8(2)             |
| O(3_2)#3-Cd4-O(4_2)#3 | 55.1(2)               | O(4_1)#12-Cd1-O(4_1)    | 119.5(3)            |
| O(2_2)#4-Cd4-O(4_2)#3 | 86.8(4)               |                         |                     |
| #2 -1/2+X,-1/2+Y,+Z   | #3 1/2-X,-1/2+Y,1/2-Z | #4 -X,+Y,1/2-Z          | #5 +X,2-Y,1/2+Z     |
| #6 1/2+X,3/2-Y,1/2+Z  | #7 1/2+X,1/2+Y,+Z     | #9 1/2+X,3/2-Y,-1/2+Z   | #10 3/2-X,3/2-Y,1-Z |
| #11 3/2-X,1/2+Y,1/2-Z | #12 2-X,+Y,1/2-Z      |                         |                     |

**Table S3.** Selected bond lengths(Å) and bond angles(°) for **NLMOF-2**

| <b>NLMOF-2</b>     |           |                        |                       |
|--------------------|-----------|------------------------|-----------------------|
| K(1)-O(1)          | 2.882(17) | O(1)#3-K(I)-O(5)#7     | 127.0(4)              |
| K(1)-O(4)          | 3.23(2)   | O(4)-K(I)-O(4)#5       | 66.5(8)               |
| K(1)-O(4)#3        | 3.23(2)   | O(5)#7-K(I)-O(4)#5     | 47.2(4)               |
| K(1)-O(5)#4        | 3.14(2)   | O(5)#6-K(I)-O(4)#5     | 71.0(5)               |
| K(1)-O(5)#5        | 3.14(2)   | O(5)#6-K(I)-O(4)       | 47.2(4)               |
| K(1)-O(7)#6        | 2.70(2)   | O(5)#7-K(I)-O(4)       | 71.0(5)               |
| K(1)-O(7)#7        | 2.70(2)   | O(5)#6-K(I)-O(5)#7     | 106.1(7)              |
| Cd(1_1)#2-O(1)     | 2.375(16) | O(7)#10-K(I)-O(1)#4    | 68.3(5)               |
| Cd(1_1)#2-O(2)     | 2.381(17) | O(7)#11-K(I)-O(1)#3    | 68.3(5)               |
| Cd(1_1)#5-O(3)     | 2.21(2)   | O(7)#10-K(I)-O(1)#3    | 87.3(6)               |
| Cd(1_1)-O(6)       | 2.165(17) | O(7)#11-K(I)-O(1)#4    | 87.3(6)               |
| Cd(1_1)#10-O(7)    | 2.325(19) | O(7)#10-K(I)-O(4)      | 130.2(5)              |
| Cd(1_1)#10-O(8)    | 2.36(2)   | O(7)#10-K(I)-O(4)#5    | 126.5(6)              |
| O(1)#3-K(I)-O(1)#4 | 147.4(8)  | O(7)#11-K(I)-O(4)      | 126.5(6)              |
| O(1)#3-K(I)-O(4)   | 73.6(5)   | O(7)#11-K(I)-O(4)#5    | 130.2(5)              |
| O(1)#4-K(I)-O(4)#5 | 73.6(5)   | O(7)#11-K(I)-O(5)#7    | 161.8(6)              |
| O(1)#3-K(I)-O(4)#5 | 138.8(6)  | O(7)#11-K(I)-O(5)#6    | 86.7(5)               |
| O(1)#4-K(I)-O(4)   | 138.8(6)  | O(7)#10-K(I)-O(5)#6    | 161.8(6)              |
| O(1)#3-K(I)-O(5)#6 | 74.7(5)   | O(7)#10-K(I)-O(5)#7    | 86.7(5)               |
| O(1)#4-K(I)-O(5)#7 | 74.7(5)   | O(7)#11-K(I)-O(7)#10   | 84.3(9)               |
| O(1)#4-K(I)-O(5)#6 | 127.0(4)  |                        |                       |
| #3 -1+Y,1+X,-Z     |           | #4 -1/2-X,1/2+Y,-1/4-Z | #5 -1/2+Y,1/2-X,1/4+Z |
| #6 +Y,1+X,-Z;      |           |                        |                       |
| #7 +X,1+Y,+Z       |           |                        |                       |

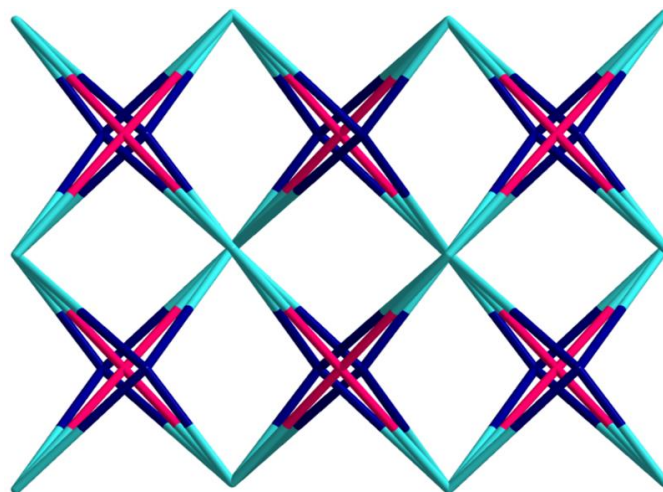

**Fig. S1** Topology graph of NLMOF-1

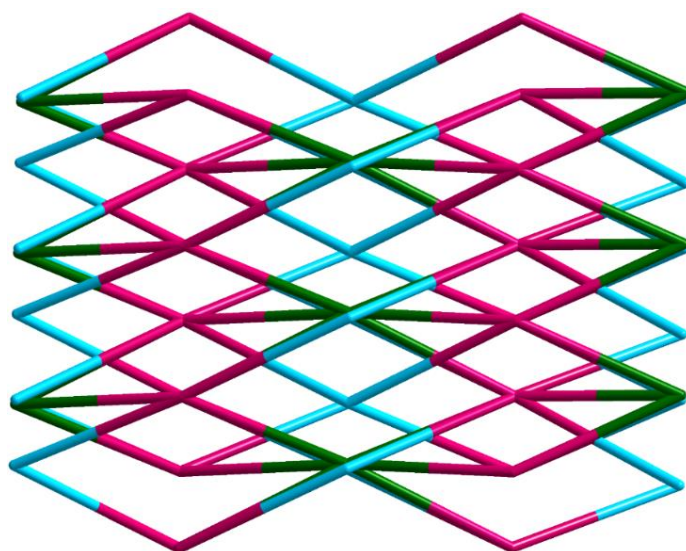

**Fig. S2** Topology graph of NLMOF-2

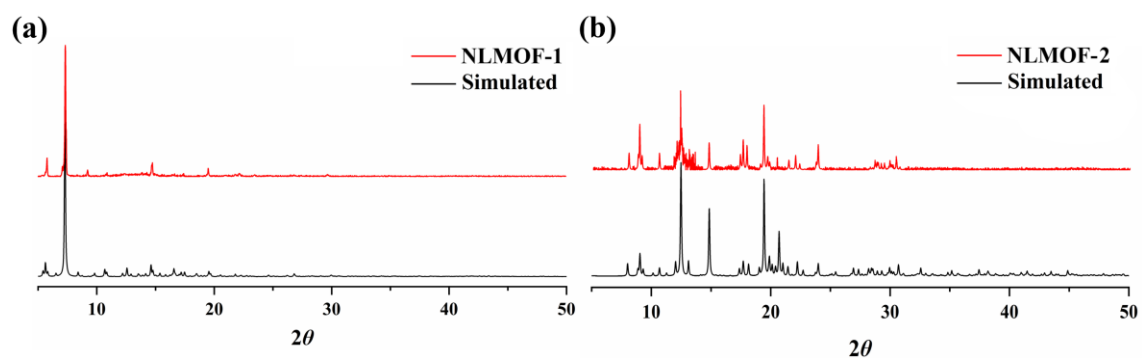

**Fig. S3** Powder X-ray diffraction pattern of NLMOF-1 and NLMOF-2



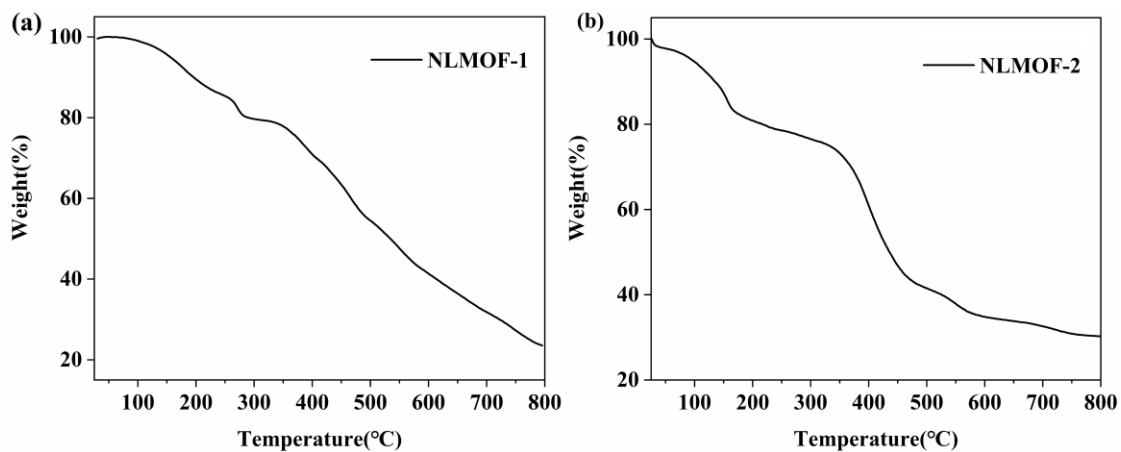

**Fig. S4** (a) TG curve of NLMOF-1; (b) TG curve of NLMOF-2

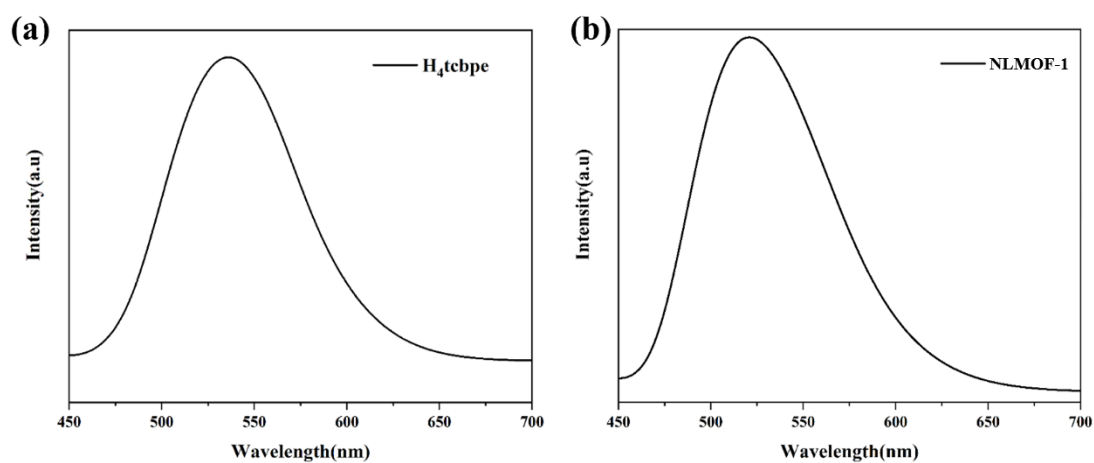

**Fig. S5** The solid state fluorescence spectrum of H<sub>4</sub>tcbpe ligand (a) and NLMOF-1 (b)

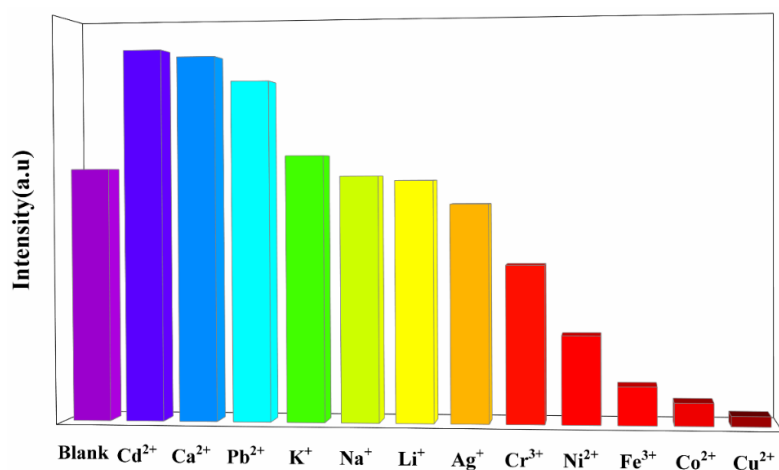

**Fig. S6** Emission spectra of NLMOF-1 in 10mM different cations at 430 nm in H<sub>2</sub>O

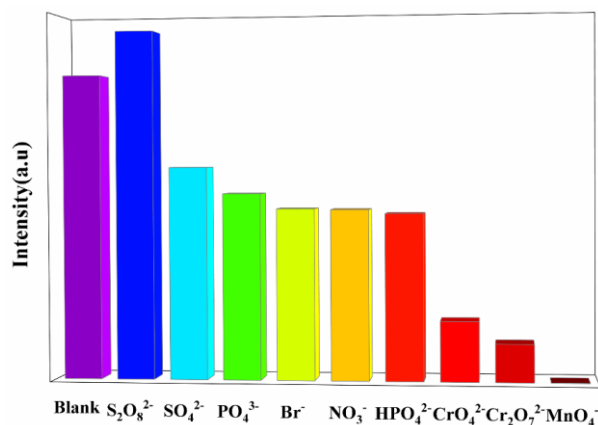

**Fig. S7** Emission spectra of NLMOF-1 in 10mM different anions at 430 nm in H<sub>2</sub>O

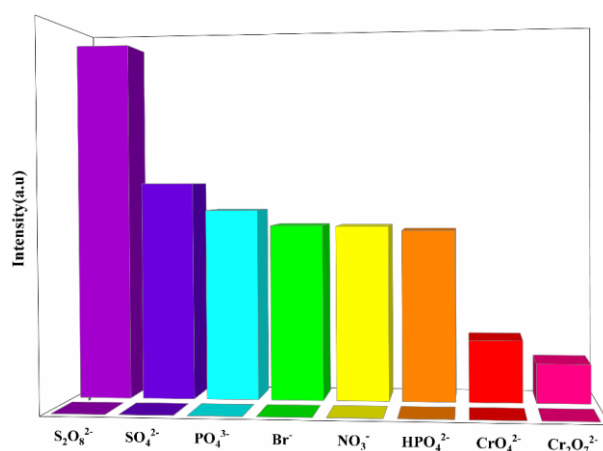

**Fig. S8** Fluorescence intensity of NLMOF-1 when  $MnO_4^-$  coexists with other anions in H<sub>2</sub>O

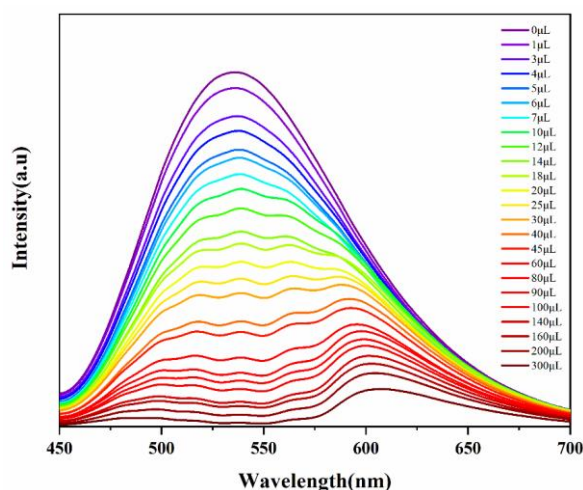

**Fig. S9** Emission spectra of NLMOF-1 dispersed in H<sub>2</sub>O with different concentrations of  $MnO_4^-$

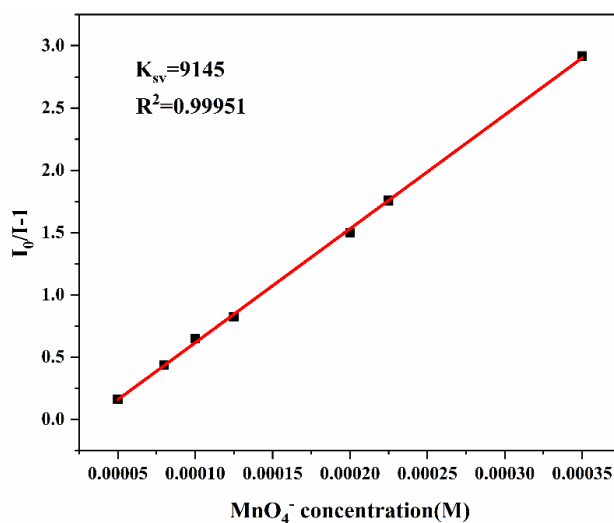

**Fig. S10** Stern-Volmer plot of different concentrations of  $MnO_4^-$  exist in  $H_2O$  of NLMOF-1

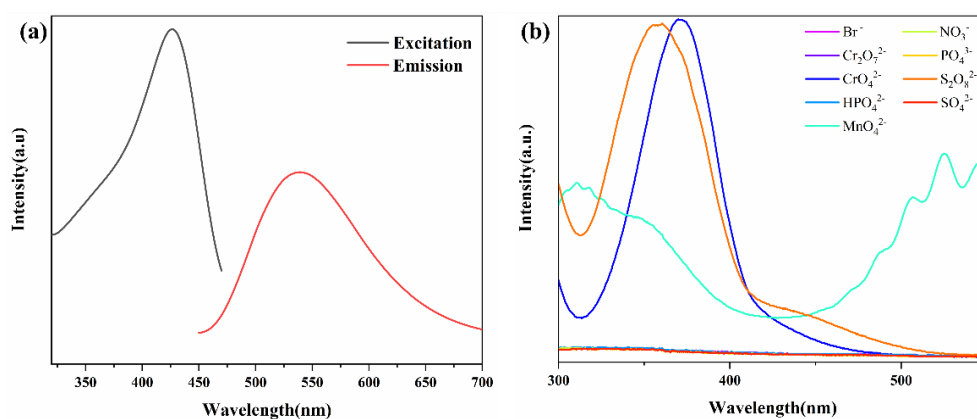

**Fig. S11** (a) Excitation spectra of NLMOF-1 in aqueous solution; (b) UV-vis adsorption spectra of  $Na_x(A)$  in aqueous solution

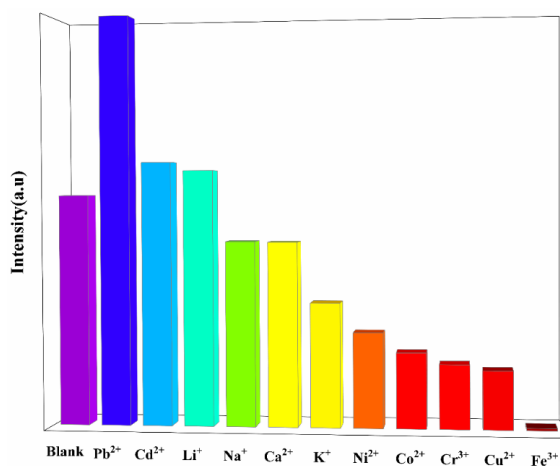

**Fig. S12** Emission spectra of NLMOF-1 in 10mM different cations at 430 nm in DMF

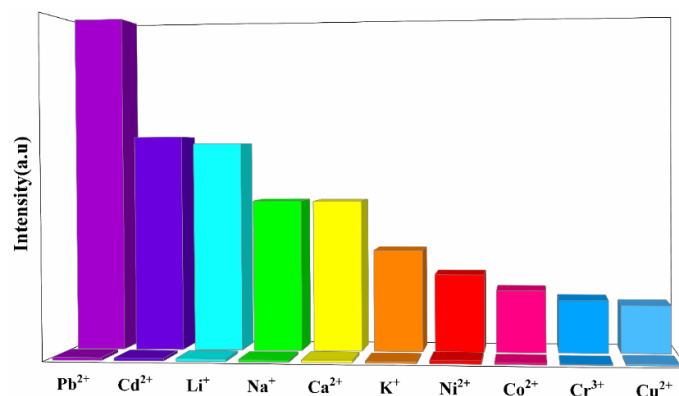

**Fig. S13** Fluorescence intensity of NLMOF-1 when  $\text{Fe}^{3+}$  coexists with other cations in DMF

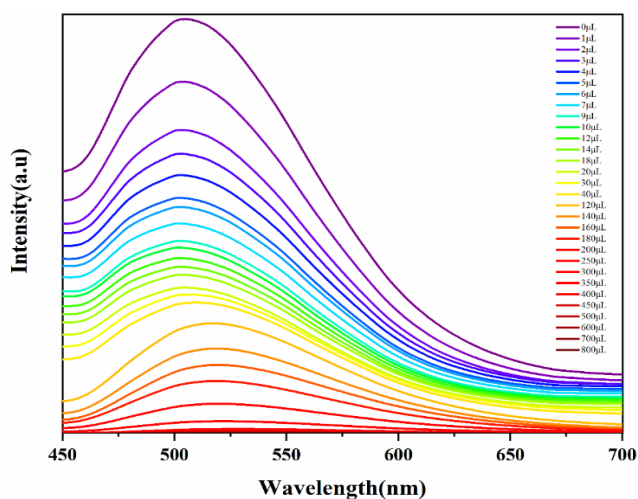

**Fig. S14** Emission spectra of NLMOF-1 dispersed in DMF with different concentrations of  $\text{Fe}^{3+}$

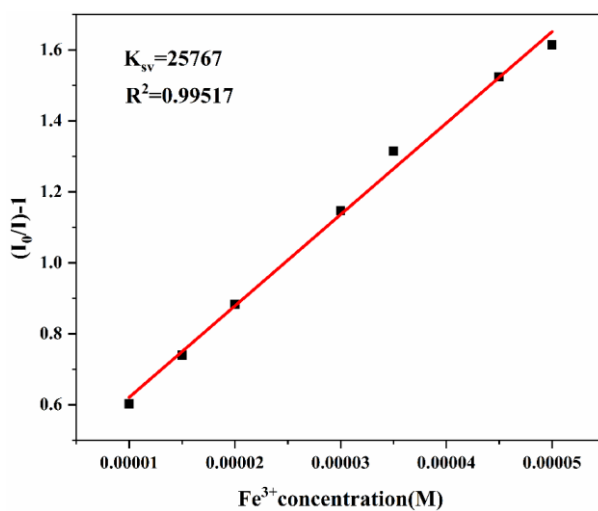

**Fig. S15** Stern-Volmer plot of different concentrations of  $\text{Fe}^{3+}$  exist in NLMOF-1

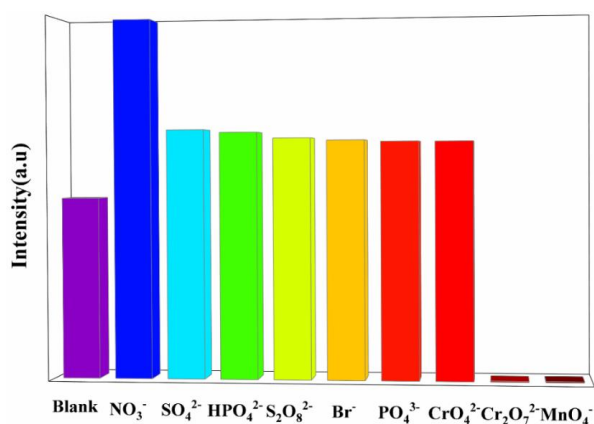

**Fig. S16** Emission spectra of NLMOF-1 in 10mM different anions at 430 nm in DMF

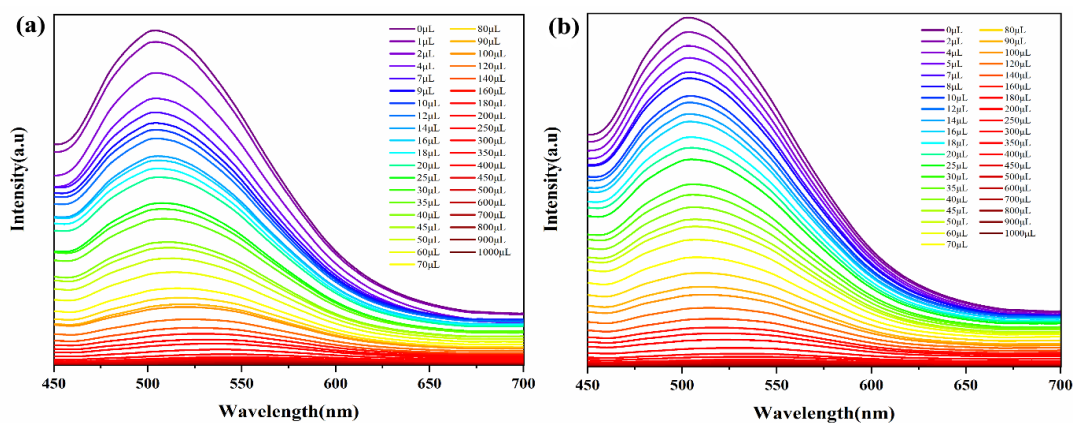

**Fig. S17** (a) Emission spectra of NLMOF-1 dispersed in DMF with different concentrations of  $\text{Cr}_2\text{O}_7^{2-}$ ; (b) Emission spectra of NLMOF-1 dispersed in DMF with different concentrations of  $\text{MnO}_4^-$

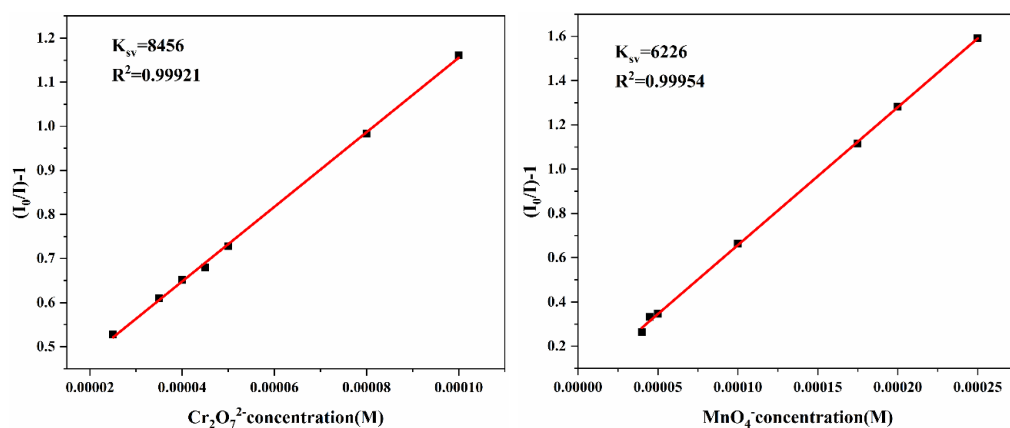

**Fig. S18** (a) Stern-Volmer plot of different concentrations of  $\text{Cr}_2\text{O}_7^{2-}$  exist of NLMOF-1 in DMF; (b) Stern-Volmer plot of different concentrations of  $\text{MnO}_4^-$  exist of NLMOF-1 in DMF

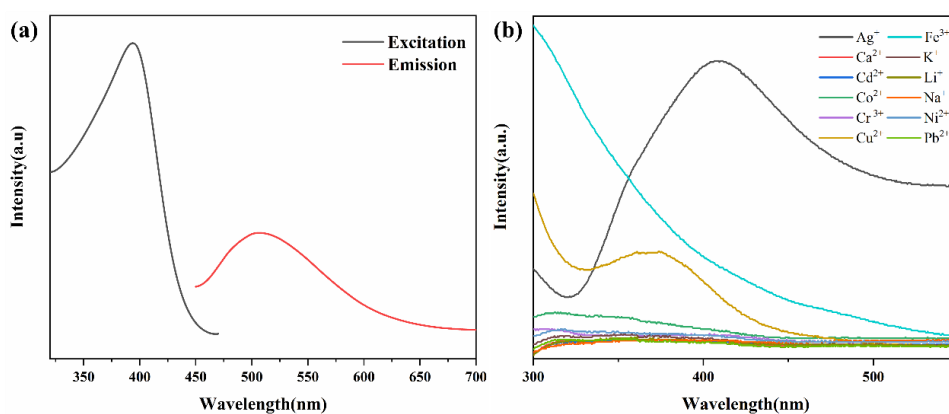

**Fig. S19** (a) Excitation spectra of **NLMOF-1** in DMF solution; (b) UV-vis adsorption spectra of  $M(\text{NO}_3)_x$  in DMF solution

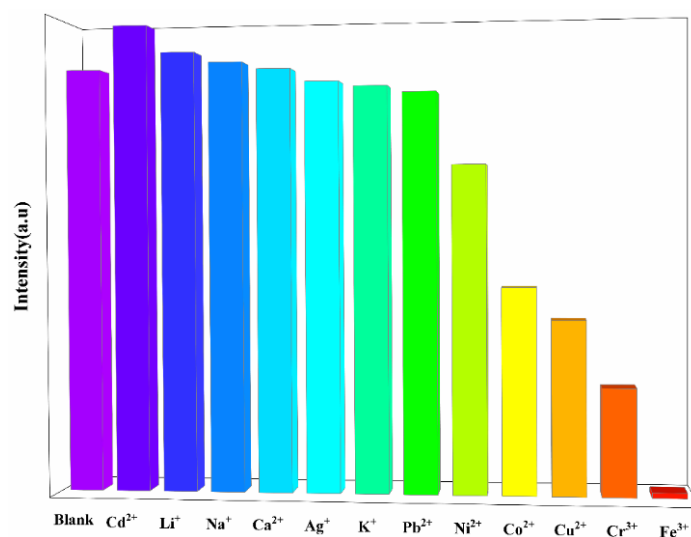

**Fig. S20** Emission spectra of **NLMOF-1** in 10mM different cations at 430 nm in acetonitrile

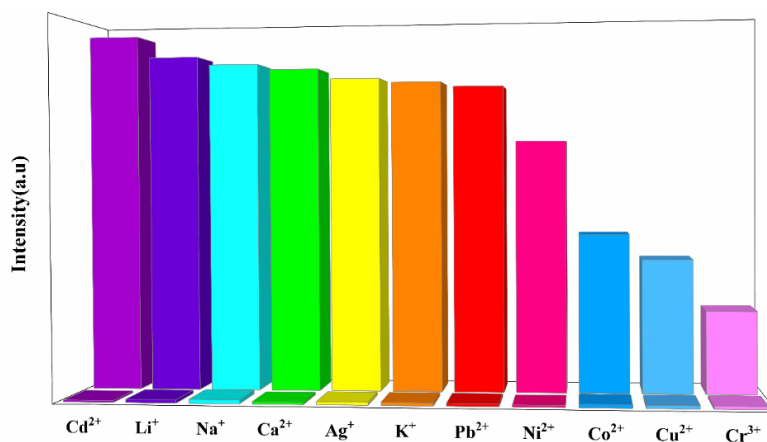

**Fig. S21** Fluorescence intensity of **NLMOF-1** when  $\text{Fe}^{3+}$  coexists with other cations in acetonitrile

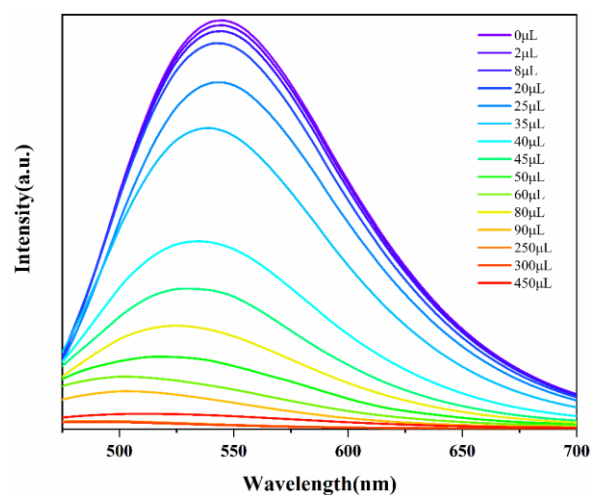

**Fig. S22** Emission spectra of NLMOF-1 dispersed in acetonitrile with different concentrations of  $\text{Fe}^{3+}$

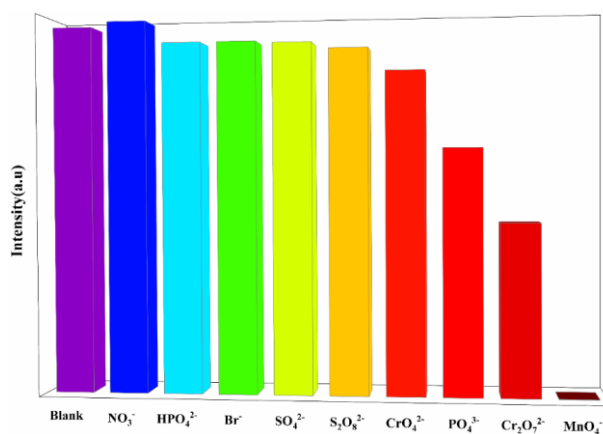

**Fig. S23** Emission spectra of NLMOF-1 in 10mM different anions at 430 nm in acetonitrile

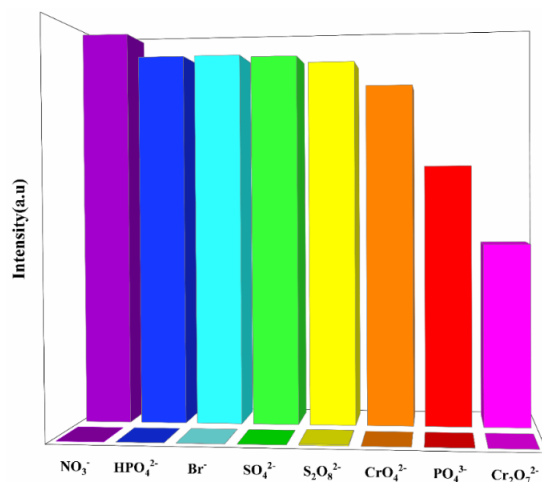

**Fig. S24** Fluorescence intensity of NLMOF-1 when  $\text{MnO}_4^-$  coexists with other anions in acetonitrile

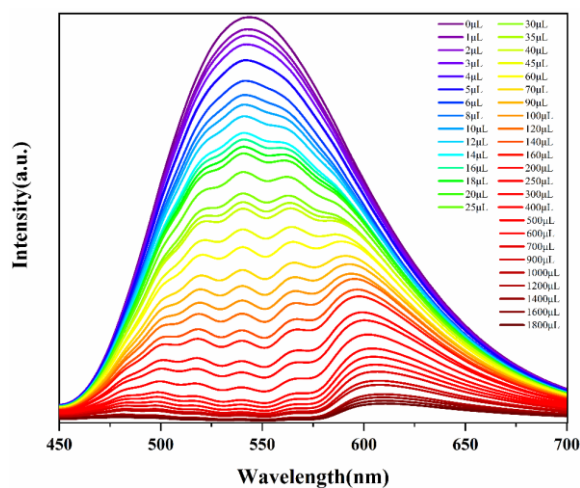

**Fig. S25** Emission spectra of NLMOF-1 dispersed in acetonitrile with different concentrations of  $\text{MnO}_4^-$

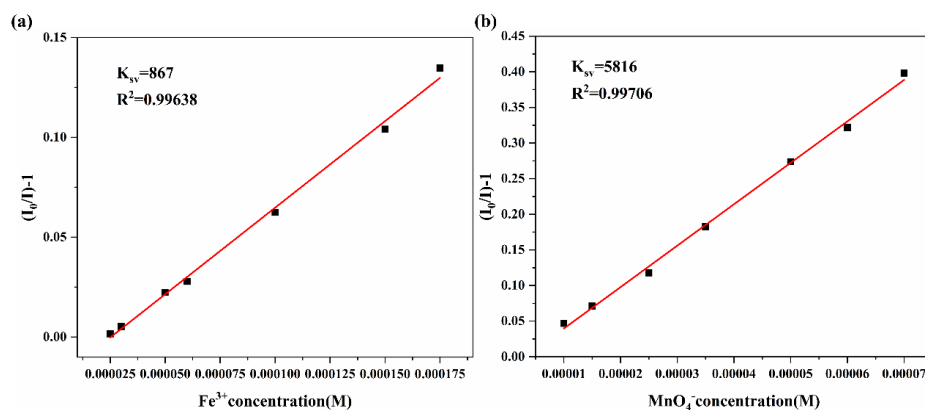

**Fig. S26** (a) Stern-Volmer plot of different concentrations of  $\text{Fe}^{3+}$  exist of NLMOF-1 in acetonitrile; (b) Stern-Volmer plot of different concentrations of  $\text{MnO}_4^-$  exist of NLMOF-1 in acetonitrile

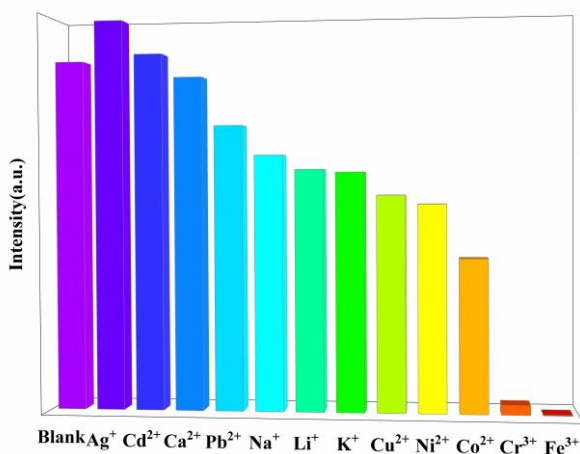

**Fig. S27** Emission spectra of NLMOF-1 in 10mM different cations at 430 nm in methanol



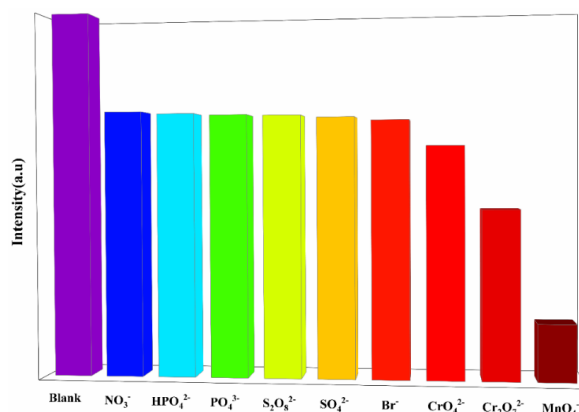

**Fig. S28** Emission spectra of NLMOF-1 in 10mM different anions at 430 nm in methanol

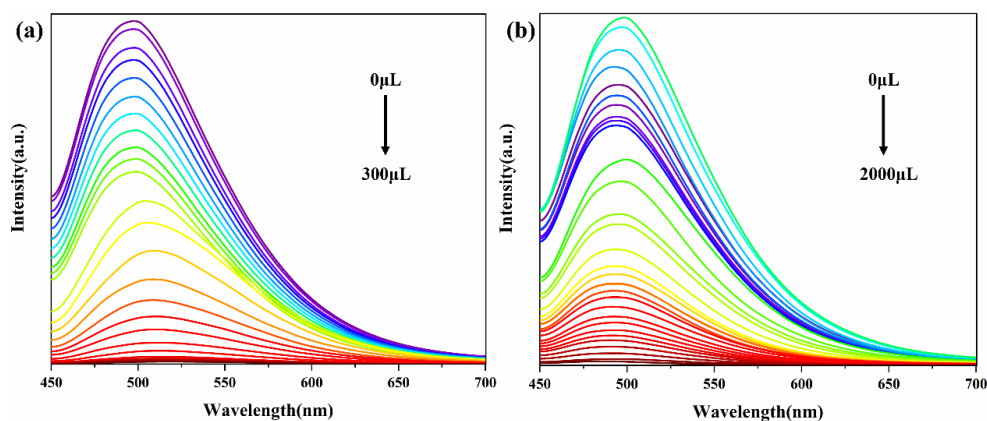

**Fig. S29** (a) Emission spectra of NLMOF-1 dispersed in methanol with different concentrations of  $\text{Fe}^{3+}$ ; (b) Emission spectra of NLMOF-1 dispersed in methanol with different concentrations of  $\text{Cr}^{3+}$

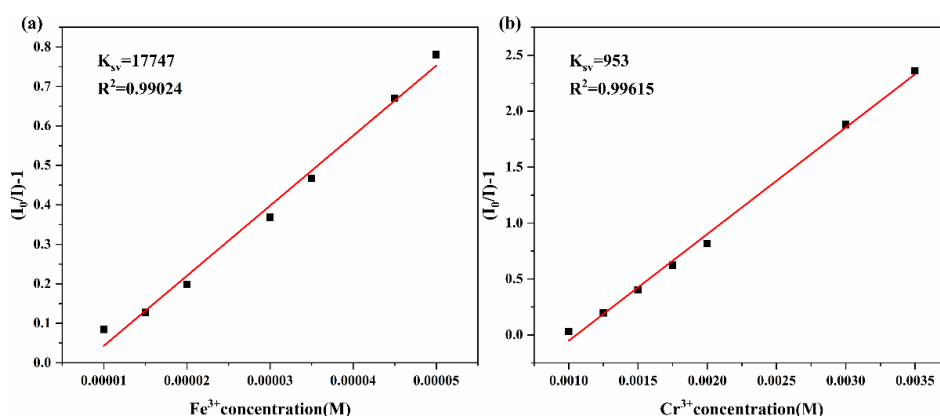

**Fig. S30** (a) Stern-Volmer plot of different concentrations of  $\text{Fe}^{3+}$  exist of NLMOF-1 in methanol; (b) Stern-Volmer plot of different concentrations of  $\text{Cr}^{3+}$  exist of NLMOF-1 in methanol

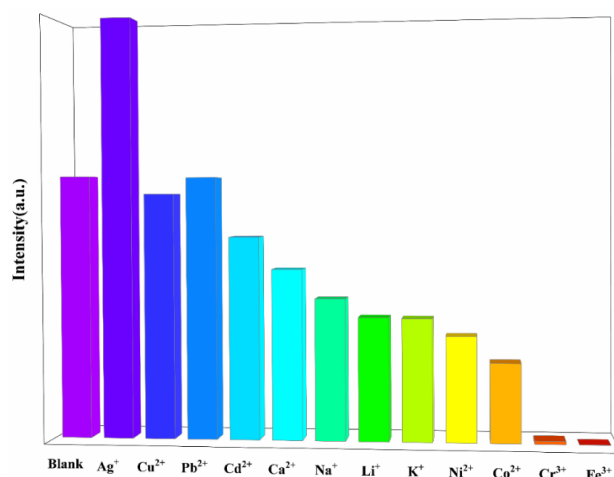

**Fig. S31** Emission spectra of **NLMOF-1** in 10mM different cations at 430 nm in ethanol

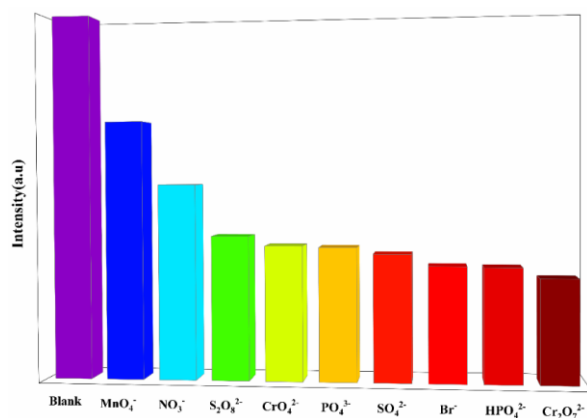

**Fig. S32** Emission spectra of **NLMOF-1** in 10mM different anions at 430 nm in ethanol

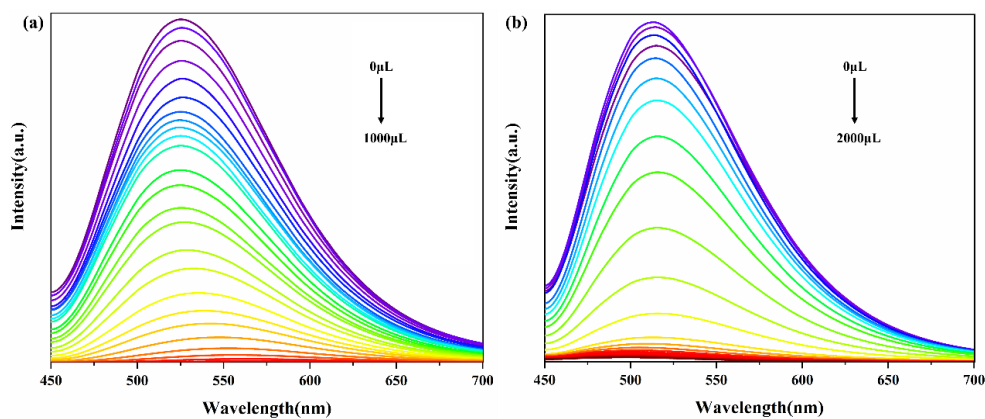

**Fig. S33** (a) Emission spectra of **NLMOF-1** dispersed in ethanol with different concentrations of  $\text{Fe}^{3+}$ ; (b) Emission spectra of **NLMOF-1** dispersed in ethanol with different concentrations of  $\text{Cr}^{3+}$

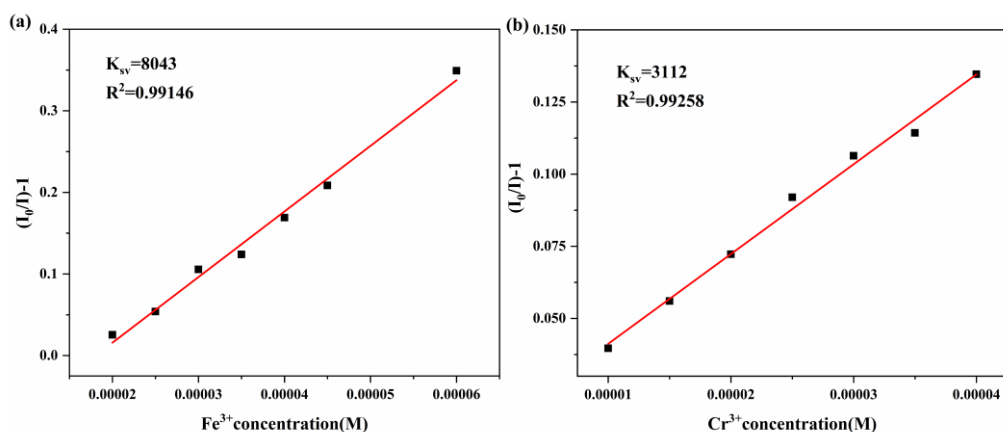

**Fig. S34** (a) Stern-Volmer plot of different concentrations of  $\text{Fe}^{3+}$  exist of **NLMOF-1** in ethanol; (b) Stern-Volmer plot of different concentrations of  $\text{Cr}^{3+}$  exist of **NLMOF-1** in ethanol

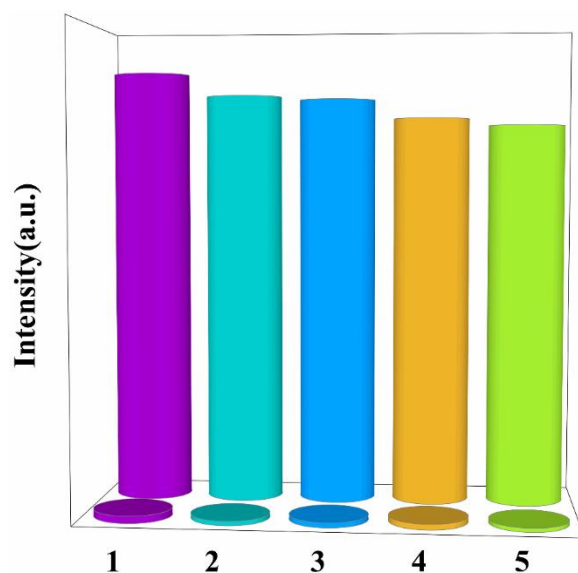

**Fig. S35** The recyclability of the quenching ability of **NLMOF-1** immersed in DMA and in the presence of 0.01 M aqueous solution of  $\text{Fe}^{3+}$  ions

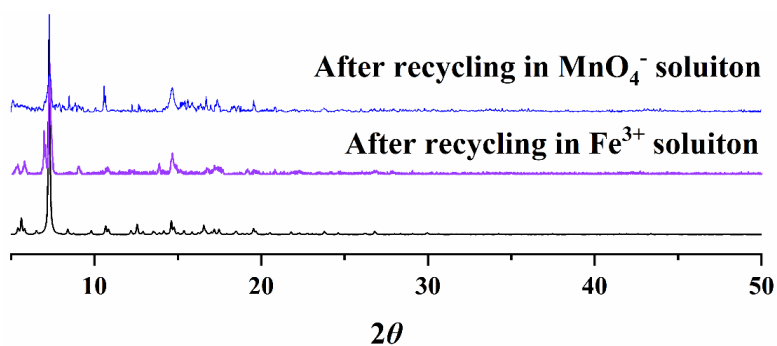

**Fig. S36** The PXRD patterns of **NLMOF-1** treated with  $\text{Fe}^{3+}$  and  $\text{MnO}_4^-$  solution in DMA

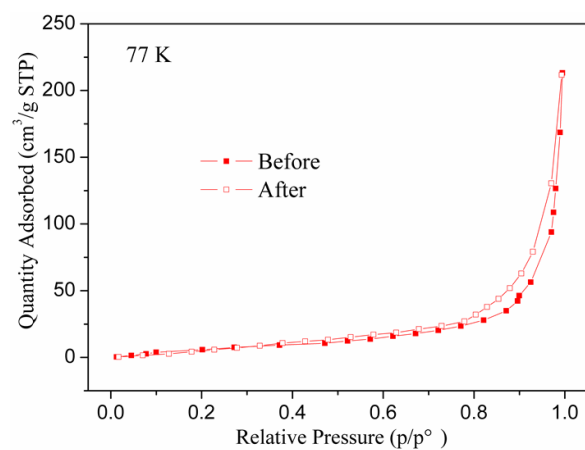

**Fig. S37** N<sub>2</sub> adsorption of **NLMOF-1** before and after sensing experiments.

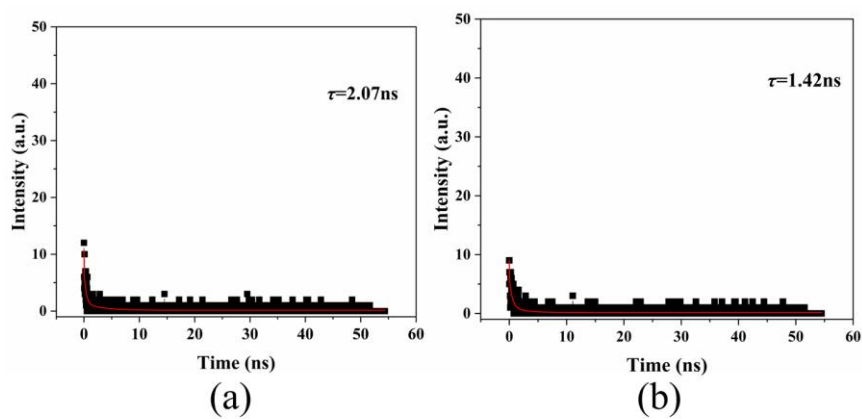

**Fig. S38** Fluorescence lifetimes of (a) **NLMOF-1** and (b) **NLMOF-1@Fe<sup>3+</sup>** (20 μL, 0.01 mol/L).
